# Supplementary material
Source: HighWire-hosted journal article supplement (https://bmjopen.bmj.com/content/10/10/e040219)
Supplement: inline-supplementary-material-1 [file inline-supplementary-material-1.pdf]

Supplementary Table 1. WHO Trial Registration Dataset

| Dataset Category                         | Information                                                                                                                                                                                                                                                                                                                                                                                                                                                    |
|------------------------------------------|----------------------------------------------------------------------------------------------------------------------------------------------------------------------------------------------------------------------------------------------------------------------------------------------------------------------------------------------------------------------------------------------------------------------------------------------------------------|
| Primary Registry/Number                  | ClinicalTrials.gov NCT03752840                                                                                                                                                                                                                                                                                                                                                                                                                                 |
| Date of Registration                     | 16 November 2018                                                                                                                                                                                                                                                                                                                                                                                                                                               |
| Secondary Identifiers                    | UG1EY028097                                                                                                                                                                                                                                                                                                                                                                                                                                                    |
| Source of Monetary Support               | National Eye Institute - National Institutes of Health                                                                                                                                                                                                                                                                                                                                                                                                         |
| Primary Sponsor                          | National Eye Institute - National Institutes of Health                                                                                                                                                                                                                                                                                                                                                                                                         |
| Contact for Public or Scientific Queries | Jeremy Keenan, MD MPH<br><a href="mailto:Jeremy.Keenan@ucsf.edu">Jeremy.Keenan@ucsf.edu</a><br>(415) 476-6323<br>513 Parnassus Ave. S334B<br>San Francisco, CA 94313                                                                                                                                                                                                                                                                                           |
| Title                                    | Village-Integrated Eye Worker Trial II (VIEW II)                                                                                                                                                                                                                                                                                                                                                                                                               |
| Countries of Recruitment                 | Nepal                                                                                                                                                                                                                                                                                                                                                                                                                                                          |
| Health Conditions Studied                | Glaucoma, diabetic retinopathy, age-related macular degeneration                                                                                                                                                                                                                                                                                                                                                                                               |
| Intervention                             | <i>Intervention:</i> Community-based visual acuity testing plus community-based eye disease screening program (i.e., optical coherence tomography, intraocular pressure testing, and enhanced linkage-to-care)<br><i>Control:</i> Community-based visual acuity testing only                                                                                                                                                                                   |
| Key Inclusion and Exclusion Criteria     | <i>Community-level eligibility:</i> In the catchment area of Bharatpur Eye Hospital, accessible by non-4WD vehicle, local leaders consent to participate<br><i>Individual-level eligibility:</i> Resident of eligible community, ≥ 60 years old, consent to participate                                                                                                                                                                                        |
| Study Type                               | Cluster-randomized screening trial                                                                                                                                                                                                                                                                                                                                                                                                                             |
| Date of First Enrollment                 | April 21, 2019                                                                                                                                                                                                                                                                                                                                                                                                                                                 |
| Target Sample Size                       | 120 communities; 60,000 individuals                                                                                                                                                                                                                                                                                                                                                                                                                            |
| Recruitment Status                       | Ongoing                                                                                                                                                                                                                                                                                                                                                                                                                                                        |
| Primary Outcomes                         | <ul style="list-style-type: none"> <li>• Pinhole logMAR visual acuity in each eye at 4 years</li> </ul>                                                                                                                                                                                                                                                                                                                                                        |
| Key Secondary Outcomes                   | <ul style="list-style-type: none"> <li>• Incidence of visual impairment due to glaucoma, diabetic retinopathy, or age-related macular degeneration at 4 years</li> <li>• Bilateral blindness (pinhole Snellen worse than 20/400) at 4 years</li> <li>• Presenting logMAR visual acuity in each eye at 4 years (i.e., acuity tested with currently available refractive correction, if any)</li> <li>• Costs per case of visual impairment prevented</li> </ul> |
